# Supplementary figures and images for: Seedling Responses to Organically-Derived Plant Growth Promoters: An Effects-Based Approach
Source: MDPI journal article supplement (doi:10.3390/plants10040660), 2021-03-30

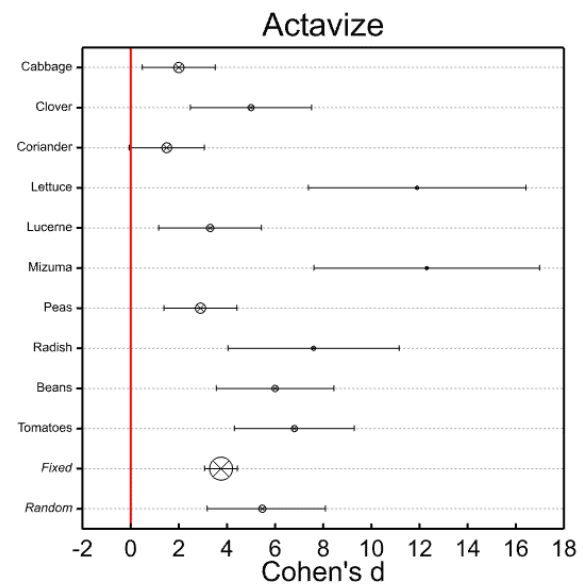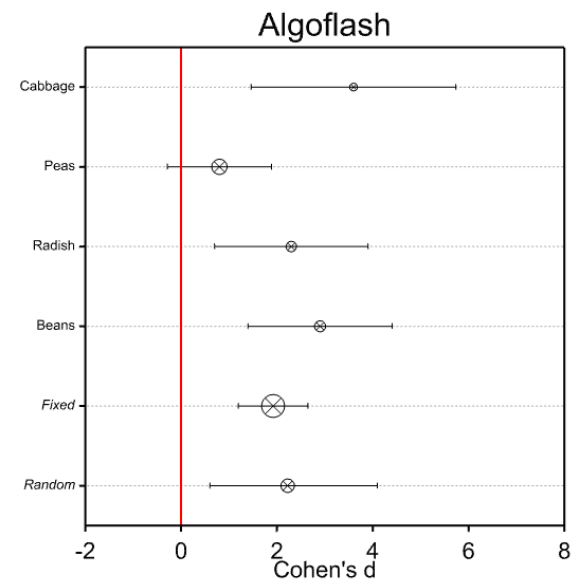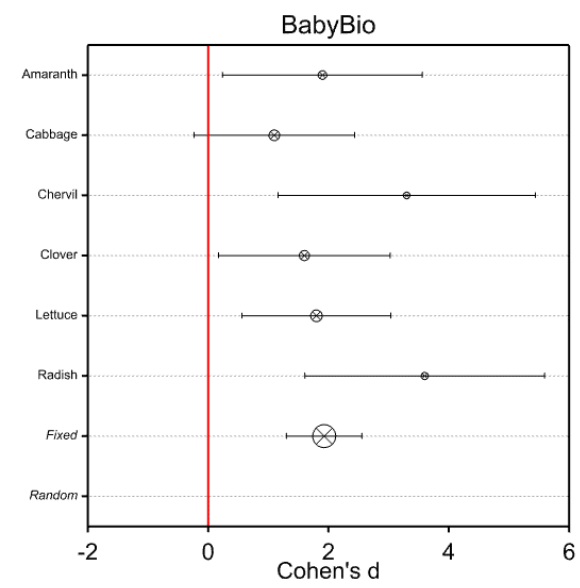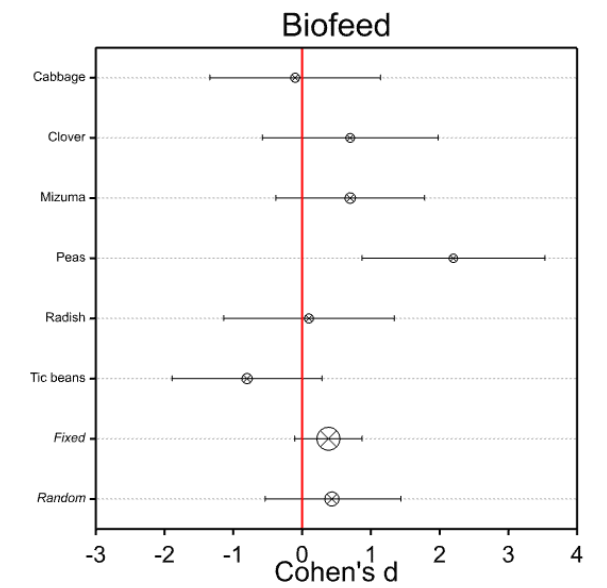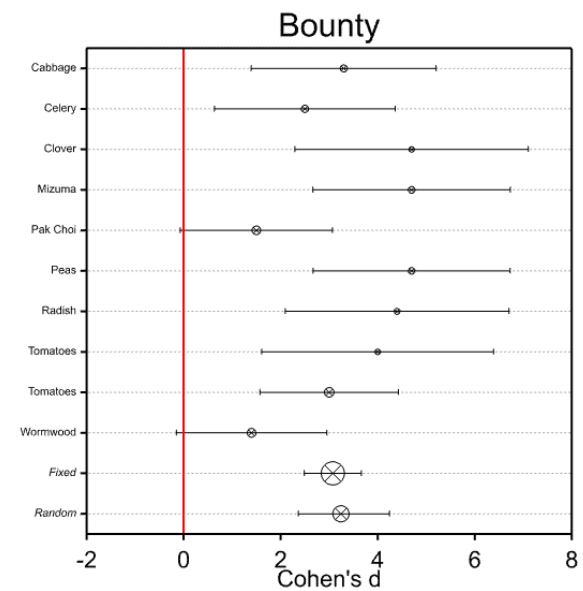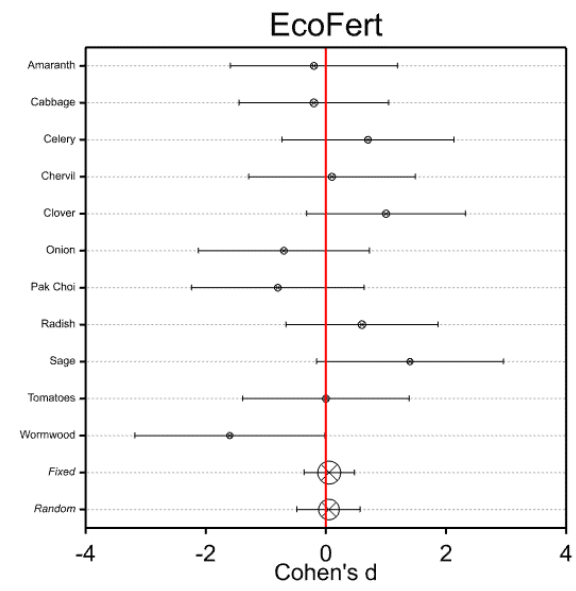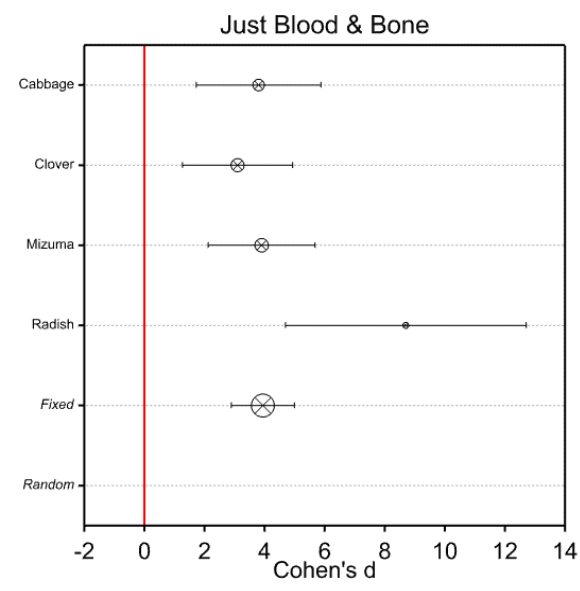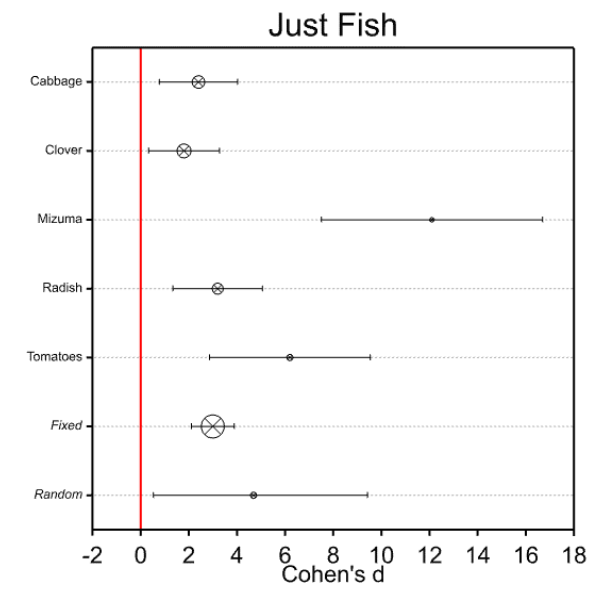

Nourish

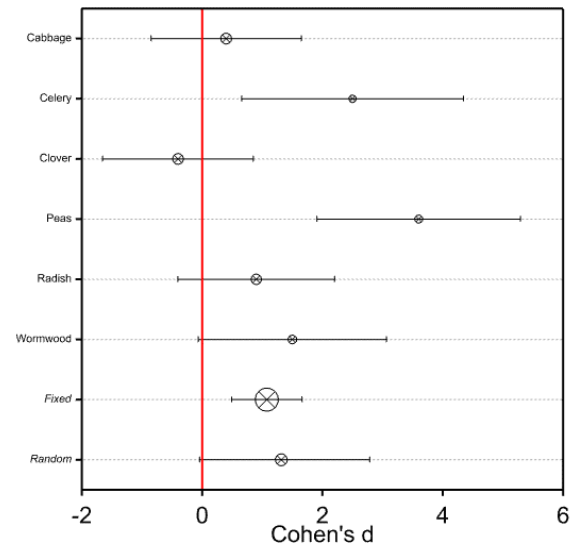

Phostrogen

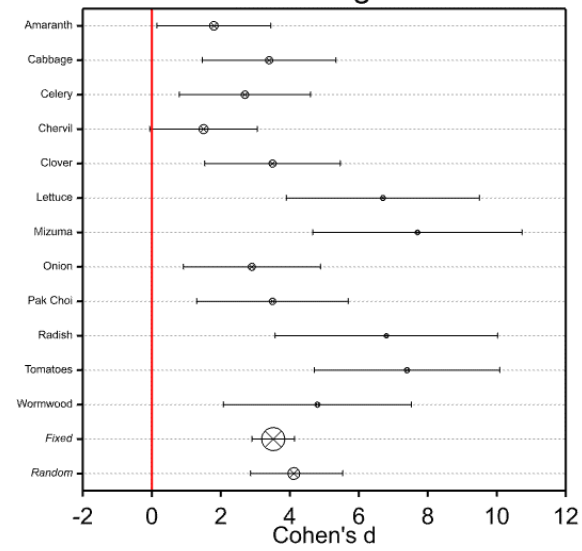

Seasol

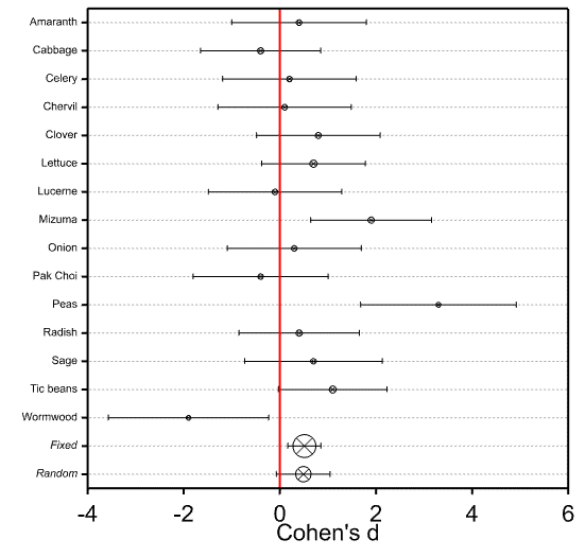

Synerlogic

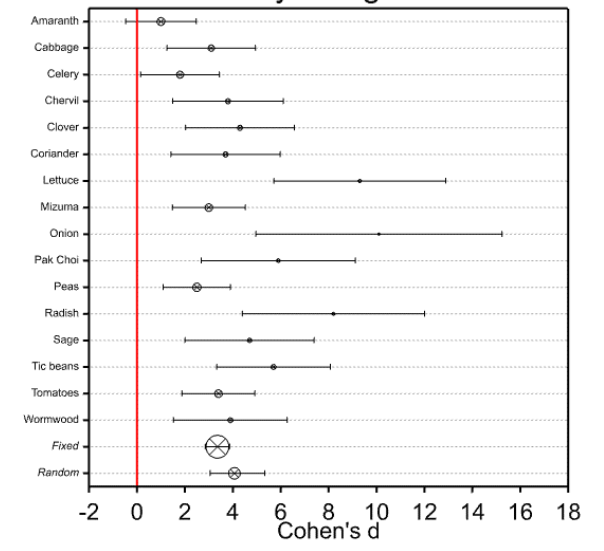

Vertesea

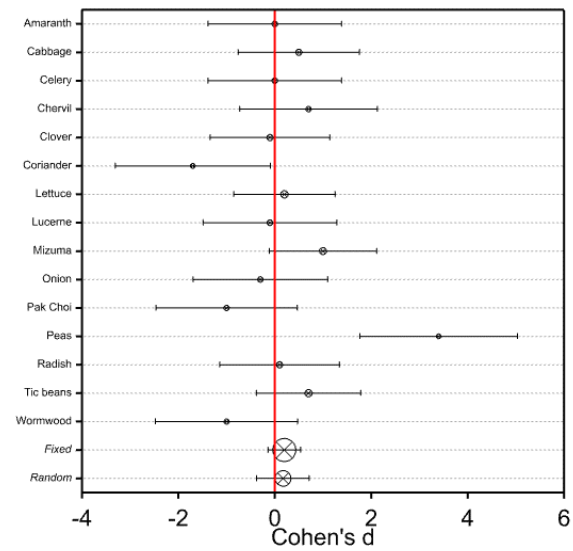

Wondergrow

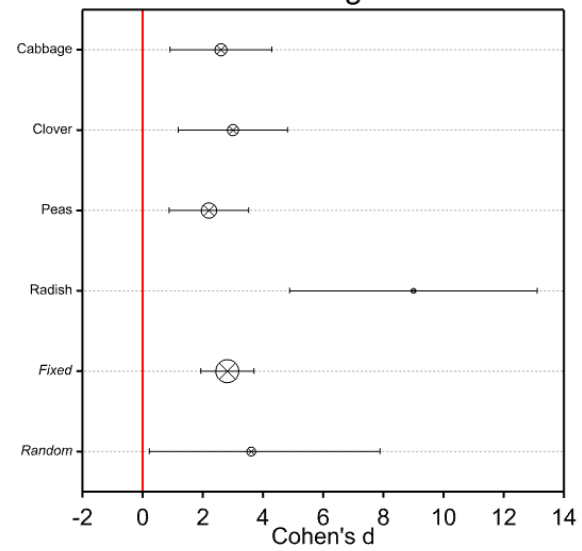

Yates Fish

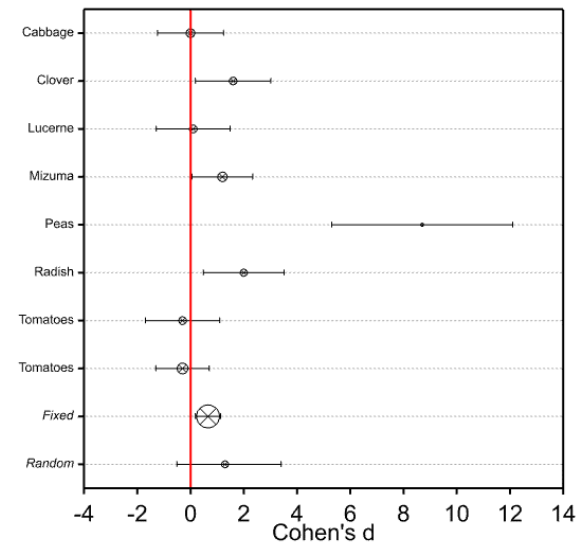

Yates Seaweed

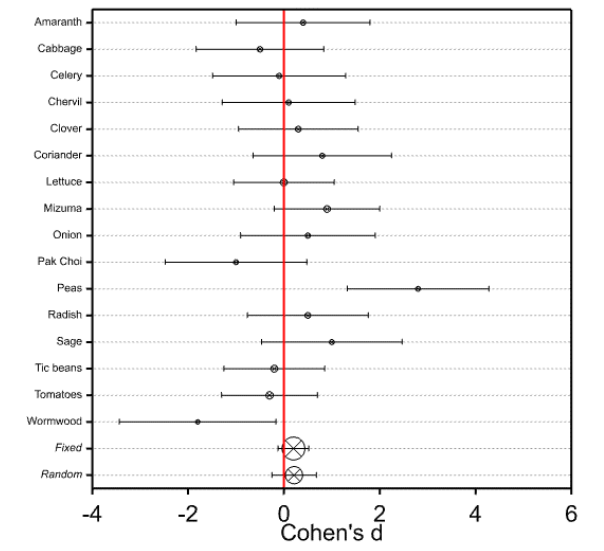

Supplement: s1 [file s1]
